# Supplementary material for: PARAFOG v2.0: a near real-time decision tool to support nowcasting fog formation events at local scales
Source: Copernicus journal article supplement (doi:10.5194/amt-2021-99), 2021-04-23
Supplement: Supplementary file [file amt-2021-99-AC2-supplement.pdf]

## Responses to Reviewer 1

We thank you for the thorough comments and changes suggested in your review of our manuscript. Our point-to-point responses are developed hereafter, along with an indication of changes made in the revised version of the text.

### General Comments:

The authors demonstrate an innovative technique of applying observed vertical gradient of backscatter profiles as well as cloud base height and visibility by way of a fuzzy-logic approach to predict the likelihood of fog onset. The new innovation serves to resolve a previously identified discrepancy in algorithm performance of shallow fog radiation fog identification. The methods are generally clear and well supported by the literature and through equations and figures. The authors provide several thorough, well-documented case study reviews demonstrating implementation followed by additional systematic statistical assessment at multiple stations. The approach appears to have applicability to additional stations globally where radiation and stratus-lowering fog are the predominant fog hazards, subject to some additional work needed to derive appropriate weights for the stratus lowering cases. The manuscript is very well written and the figures are of high quality.

I have listed several specific comments for the authors to address, but most concern suggestions to improve understanding of the methods and some clarifications. I recommend to accept following these minor revisions.

### Specific Comments:

L64-65: Would suggest that fog decay/dissipation is also a major challenge for NWP. Implemented as suggested.

L67-68: Would suggest that the authors broaden this statement from “land-atmosphere” to “surface-atmosphere” interaction as similar dependencies of fog to surface turbulent flux occur over ocean as well as land surfaces. Would also suggest that the authors acknowledge the additional components that yield difficulty in fog prediction for NWP beyond surface-atmosphere interaction, vertical resolution and atmospheric boundary layer physics, namely: cloud microphysics parameterization, radiation parameterization and potentially shallow convection parameterization in coarser models. For limited area models, boundary conditions also help determine advection, another potentially significant contribution to fog presence/absence.

We agree. The revised text: *“The difficulties of NWP fog forecasting can be explained by the fact that fog events are driven by complex surface-atmosphere interactions in the atmospheric boundary layer, where vertical resolution of NWP models is still not high enough (e.g. Philip et al., 2016). Specifically, components that yield difficulties to fog prediction for coarser-grid models are cloud microphysics parameterization, radiation parameterization and potentially shallow convection parameterization, while for limited area models, boundary conditions also help determine advection, another potentially significant contribution to fog presence or absence.”*

Figure 2: This is a helpful diagram of the algorithm. I am slightly confused, however, why there is no sensitivity to wind speed or vertical shear in the algorithm? For example, there could be a condition of high relative humidity near the ground, but the speed of the ambient horizontal wind may generate sufficient turbulence to prevent fog formation? Have the authors evaluated this as a predictor?

This is a relevant comment. Unfortunately, we did not investigate the sensitivity to low wind speed/shear in the PFG algorithm. We tried to keep PFG as simple as possible to make this tool widely and easily applicable. The comment has been, however, added in the perspectives: *“For example, wind shear analysis could be used to support fog formation prediction by assessing the ambient horizontal wind speed and checking whether it may generate sufficient turbulence to prevent fog.”*

L207-209: Using a two-hour averaged cloud fraction seems somewhat temporally coarse relative to the 1-min resolution of the algorithm (L188). Was this choice made because of the coarse frequency of the data source? Did the authors use METAR observations of cloud to make this two-hour average determination?

The rationale for this approach is to keep PFG2 “stable” and avoid frequent changes from RAD to STL module (as it may mislead the user and may induce loss of continuity in alerts). Please note that we directly use the cloud base height retrieved by the ceilometers to calculate the cloud fraction.

L219, L221: Did the Zurich airport have a hit rate of 90% or 31%? There seems to be a conflict here.

Corrected! The revised text now reads: *“At the Paris-Roissy and Vienna airport sites, hit rates of about 90 % were achieved, while the performance was markedly lower than 50 % at the airport of Munich (37%) and Zurich (31%).”*

Figure 3: I like how subplots (c) and (d) clearly indicate a clustering of patterns between the hit and miss incidents, complementing the explanation in the text well. In subplot (a), however, I do not understand how approximately 70 percent of all times observed during the verified fog periods for which PFG1 failed (misses) have observed visibilities greater than 1 km? On L168, the authors define events with visibility less than 1 km within at least three of five blocks of 10 min. Shouldn't there be no more than 40 percent of times showing visibilities exceeding 1 km? If this is not a mistake, then I think there needs to be much more clarification to the reader as to what is displayed in this figure. Also, it is a bit bewildering how nearly 20 percent of times during these ‘missed’ verified fog periods yield observed visibility exceeding 6 km. Given the time restrictions imposed by the authors on defining a fog event, how these kinds of outliers be explained physically? Are these outliers’ artifacts of fog having decayed away completely but while time remains inside the 50 min window?

We think there is a misunderstanding. Figure 3 subplot (a) shows the visibility distribution at 20m during the first 60 minutes of hit/missed radiation fog events recorded at SIRTa. This illustrates that most of the time (~ 70-75%) visibility at 20m associated to missed events is greater than 1000m (whereas it represents only ~25% at 4m in subplot (b)). Now if we combine this information with subplots (c-d), we can conclude that PFG1 missed events are related to shallow radiation fog layers as explained in the manuscript.

Note that visibility measurements used for the Figure 3 a-b have a (native) time resolution of one minute. We did not use averaged blocks of 10min as in Tardif & Rasmussen (2007).

L277-278: This may be related my (mis) understanding of the alert level concept – but why is the RAD layer thickness discrimination only performed for RAD HIGH alerts? Is it not of interest at any likelihood (low, medium, high) to know whether the potential RAD fog event would be thick or thin? Or is it because the viability of the RG method breaks down under conditions of weaker likelihood?

In theory, it should be possible to discriminate between thick and thin events for moderate alert level as RG values should be greater than  $4e^{-4} \text{ sr}^{-1} \cdot \text{m}^{-1}$ . However, the thick-thin discrimination was empirically derived from only few RAD fog events at SIRTa. It requires a more robust in-depth analysis before to be extended to moderate alerts. This could be applied in a near future within an updated version of PFG.

L288-289: I assume that the reason there are two separate Aggregation (A) equations to describe CBH lowering and lifting is that the former has some predictability through the time change of visibility and CBH quantities, whereas the latter does not (with respect to visibility and CBH alone)? Did the authors consider any other environmental predictor for CBH lifting? I think it would be helpful for the reader to have some understanding behind the authors' decision here regarding the two separate A equations. Regarding the weights, is the implication that future applications of this approach will require the assessment of a long period of fog climatology to generate these empirical values?

Weights were only defined for negative gradients in visibility and CBH. Stratus lifting will deliver no alert by using CBH lowering aggregation equation, even if the stratus is close to the surface. This makes it possible to avoid the discontinuity in the monitoring of stratus clouds and the resulting PFG2 alerts.

Regarding the weights (i.e. speeds), we assume there are area-dependant and it is better to have a substantial period of fog climatology to properly define them. However, the use of the default weights (i.e. from SIRTa) appears to work well at the different European sites in this study (Figure 9b).

To clarify the need for the two aggregation equations, the revised text now reads: *“As stratus clouds may oscillate a few tens of meters above the surface before lowering and leading to a fog, we define two aggregation equations to avoid any discontinuity in the alerts delivered.”*

L357: Section 5a describes important details about the methodology. I think this would be generally better suited earlier in the manuscript, before discussion of case studies. This might help with improving understanding of the ‘alert’ concept.

We forgot to mention the retrieved pre-fog alert levels in the overview of PFG2 in section 3.a. This should now improve the understanding of the alert concept. Note that we keep assessment methodology in section 5a.

The revised text now reads:

*“The methodology of the PFG2 algorithm (Figure 2) is divided into three main steps:*

*a) PFG2 is “turned ON” when the relative humidity measured at ground level exceeds a value of 85 % for a period of at least 10 min.*

*b) The visibility allows discriminating between the formation and mature fog stages. If the visibility is greater than 1000 m for a period of at least 10 min, a fog formation module is activated.*

*c) The distinction between RAD and STL fog type during the formation stage is based on the cloud fraction analysis deduced from ALC measurements. If the two-hour averaged cloud fraction between 0 and 1000 m a.g.l. is greater (lower) than 50 %, the STL (RAD) formation calculation is activated. To reliably distinguish between RAD or STL fog situation, the cloud fraction calculation is updated every hour.*

*d) PFG2 retrieves pre-fog alerts (low, moderate, high) every minute indicating the risk of fog formation.”*

L375-390: It seems like the ‘alarm’ concept is really more of a decision to be made by an operational forecasting center given the ‘alert’ result of the algorithms. It’s arguably beyond the scope of the scientific work presented here. It’s OK to keep, but this could be one area to trim if adding content elsewhere, I think the quantification of “false alarms” is best done following the conventional contingency table methodology, as the authors do in the ensuing section.

We agree with the reviewer. The alarm concept is something we would recommend for final users, but this is tricky to implement in near real-time version for the moment.

Section 5c: Some lingering confusion here for me about the applicability of the alert in time. A HIGH alert multiple hours (or at least 45 minutes (L 369)) ahead of the first observation of fog is technically false alarm, yes? I think I understand the objective here to demonstrate that more first HIGH alerts happen nearer to the observed start of the fog, though Figure 10 doesn’t seem to clearly distinguish the ‘good’ results from the ‘bad’...Perhaps add some kind of marking at 45 minutes?

A hit happens whenever there is continuous high alerts at least 45 minutes before formation time, that are followed by a fog event. Here we try to find out the temporal distribution of the first HIGH alert that will result in a subsequent fog event during period of hits. With this regard, PFG2 alert occurrences and durations depend on pre-fog conditions. Sometimes fog formation may last several hours with high values of RG, or low CBH...leading PFG2 to deliver continuous HIGH alerts during a “long” period. If the HIGH alerts exceed 45min, it is possible to have multiple and successive HIGH alarms. According to the rule defined in section 5.a.3: “*successive sub-periods presenting the same alarm levels are gathered in a single alarm (e.g. two consecutive HIGH alarms are counted as one)*”. So, it can be considered as a hit even if a HIGH alert appears one hour before the observed fog onset.

The main goal of such a tool like PARAFOG, is to anticipate as much as possible the occurrence of RAD/STL fog events. But also, to find the right compromise between delivering HIGH alerts only few minutes before an event and several hours before. Our HIT definition is based on operational parameters. Hence, if a fog event is correctly forecasted, even if it was earlier than 45 min before fog formation, we declare it as a HIT because it helped the user to prepare for the eventual fog case. This capability is the most important for air traffic controllers. A false

alarm, based on our definition, would happen when a fog event is predicted (HIGH ALARM) without subsequent formation of fog. This is what we use in our evaluation scheme (Figure 8). In this second version of PFG, we tried to mitigate the negative impact of a too long period with HIGH alerts, as it would probably mislead weather forecasters and air traffic controllers in their decision making. Today it seems to us that PFG2 is rather correctly optimized.

### Technical Corrections:

L51: add a space between ‘l’ and ‘km’, same issue on L138

Corrected.

L56: again: word choice; perhaps the authors mean ‘also’ or “as well”?

Corrected.

L75: Note that some LES models (e.g. Cloud Model 1 : <https://www2.mmm.ucar.edu/people/bryan/cm1/>) have the ability to incorporate cloud microphysical parameterizations.

Thanks for the reference.

L78: wording: allows (someone/thing) to monitor fog – OR – allows monitoring of fog... “allows” here needs to be followed by a noun; This grammar issue happens again on L93, L184, L203, L251 and elsewhere (I stopped seeking this out after L251).

Thanks for the grammar reminder! We checked and corrected all sentences containing “allow”.

L92: recommend omitting ‘true’ – the measurements will also have some error

Corrected as suggested.

L94: variable -> variables

Done.

L103-104: The phrase “PFG1 retrieves pre-fog alert levels” is a bit unclear at this point in the text, specifically the “alert levels”. There is brief mention in the abstract describing the levels as low, medium and high. Do pre-fog alert levels refer to designation of a relative likelihood of fog based on observed pre-fog conditions that portend a certain type (RAD, STL)? Is it meant to describe likelihood within the next 15 minutes period? I would recommend to the authors to clarify this for the reader early on in the text. I did not get a clear context for the concept of the “alert level” early on and it affected my comprehension of the text and results later.

The revised text now reads: *“With this regard, PFG1 is able to retrieve pre-fog alert levels (low, moderate, or high alert) with a vertical resolution of about 15 m ranging from 0 to 400 m a.g.l. and time resolution of one minute.”*

L163: Please spell out ‘9’ (any number less than 10). Same on line L168, potentially elsewhere where a single digit is used that is not a measured quantity.

Corrected.

L184: I think maybe the authors mean “key physical parameters”?

Corrected as suggested.

Section 3b: I think a full contingency table (hit, miss, false alarm, correct reject) would be useful for clarification and transparency here. The authors indicate hits and misses in the text here, but also important for more complete algorithm performance assessment are the complementary statistics of false alarms and correct rejections. The authors could choose to coordinate this with Figure 9, simply by expanding analysis to include FA and CR here and the M and CR in Figure 9 (i.e., show all four statistics for all four stations for PFG1 here, then make Figure 9 a complementary figure of comparison).

Categorical statistics such as hit rate or false alarm ratio scores in the manuscript are computed in order to highlight the PFG2 performance and represent the best arguments to promote the use of PFG2. It represents what a user should expect when observing HIGH alerts. We believe that indicating the full contingency table would not add much to the study since both hit rate and false alarm ratio are already based on hits, misses and false alarms. Note that the correct rejections were deliberately not taken into account since most of the time there are no fog events (that will result in high number of CRs).

To complete the performance assessment results we added the “full” contingency table with hit/miss/false alarm scores (Table 3 in the revised manuscript).

L274: Apparent errant period between the  $\text{sr}^{-1}$  and  $\text{m}^{-1}$ ; this also occurs elsewhere in the text.

Corrected.

Figure 5: Could you please shift the colorbar from subplot (d) downward to straddle between (d) and 9e) so that the reader knows to associate the plotted field in (e) with that backscatter colorbar? Otherwise it’s not immediately obvious what is being plotted in subplot (e).

Corrected as suggested.

L343-351: Please follow a consistent format on the display of time (e.g. HH:MM UTC preferred over HHhMM UTC)

Fixed!

L403, 405: These definitions should appear earlier in the text, when the authors first introduce the contingency table terms.

Same remark as for reviewer 2. These definitions now are in section 3a.

Figure 9: Building on my earlier comment in Section 3b, this figure should illustrate all four standard contingency table statistics (H, M, FA, CR) to provide a well-rounded assessment of the results.

[Please see earlier response in Section 3b.](#)
